# Supplementary material
Source: Springer Nature journal article supplement (https://www.springermedizin.de/resource/supplementary/12889_2013_6011_MOESM3_ESM.pdf/9494138)

a

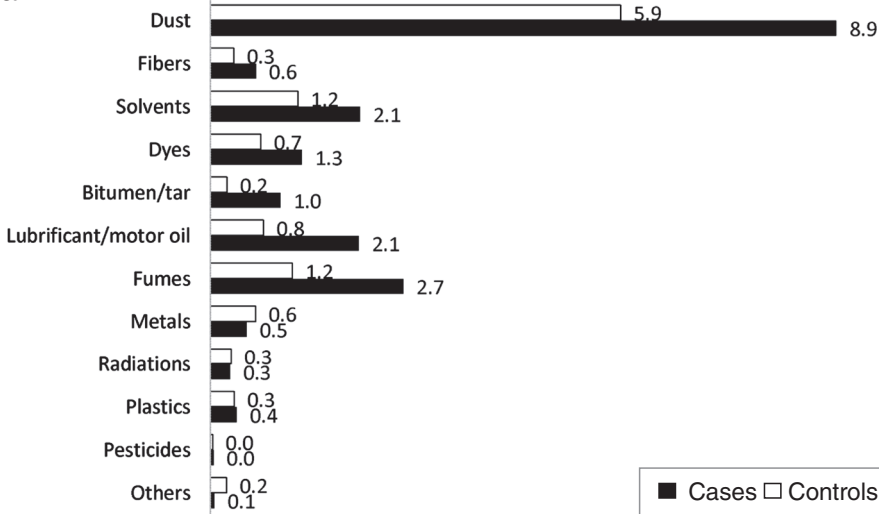

b

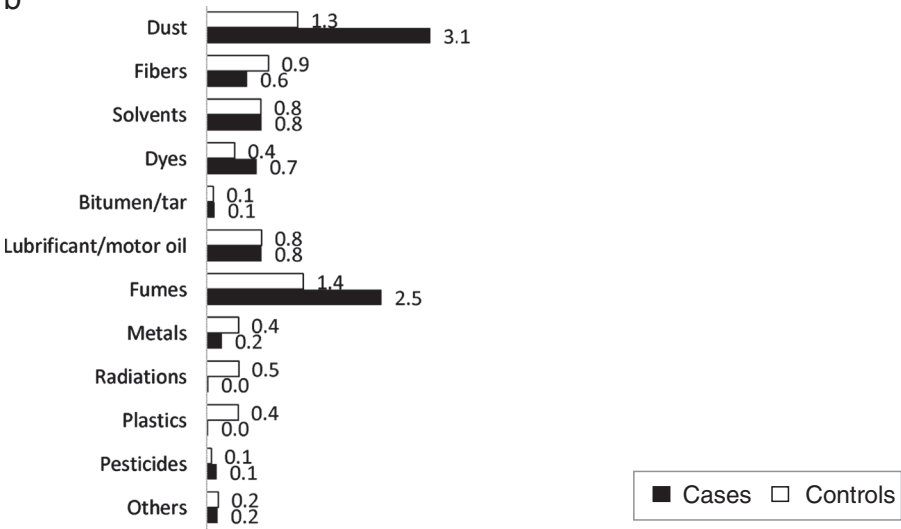

Supplement: MOESM3 [file 9494138]
